# Supplementary material for: Risk Stratification of Patients with Pulmonary Arterial Hypertension: The Role of Echocardiography
Source: MDPI journal article supplement (doi:10.3390/jcm11144034), 2022-07-12
Supplement: s1 [file s1]

**Table S1.** Patients Included in Study

| Study                             | Enrollment Period | Total Number of PAH Patients with Echocardiographic Data | Number of PAH Patients Excluded from This Study                                          | Number of PAH Patients Included in This Study |
|-----------------------------------|-------------------|----------------------------------------------------------|------------------------------------------------------------------------------------------|-----------------------------------------------|
| <b>Forfia et al. 2006 [13]</b>    | 2004              | N = 47                                                   | N = 15 (Incident Patients)                                                               | N = 32                                        |
| <b>Mathai et al. 2011 [17]</b>    | 2004–2009         | N = 50                                                   | N = 37 (25 Incident Patients; 12 Prevalent Patients Already Included from Forfia et al.) | N = 13                                        |
| <b>Mazurek et al. 2017 [18]</b>   | 2007–2013         | N = 70                                                   | N = 0                                                                                    | N = 70                                        |
| <b>Mukherjee et al. 2017 [15]</b> | 2007–2015         | N = 55                                                   | N = 24 (18 Incident Patients; 6 Prevalent Patients Already Included from Mathai et al.)  | N = 31                                        |
| <b>All Studies Combined</b>       | 2004–2015         | N = 222                                                  | N = 76                                                                                   | N = 146                                       |

Abbreviations: PAH = Pulmonary Arterial Hypertension
